# Supplementary material for: Study to Explore the Association of the Renin-Angiotensin System and Right Ventricular Function in Mechanically Ventilated Patients
Source: MDPI journal article supplement (doi:10.3390/jcm11154362), 2022-07-27
Supplement: s1 [file s1]

Supplementary material

# Study to explore the association of the renin-angiotensin system and right ventricular function in mechanically ventilated patients

Armand Mekontso Dessap, Kate Hanrott, William M. Powley, Andrew Fowler, Andrew Bayliffe, François Bagate, David A. Hall, Aili

L. Lazaar, David C. Budd, Antoine Vieillard Baron

## Additional statistical methods

Conditional on the supplied Ang II concentration, the output from the model is a joint posterior distribution for PASP and RV size ratio values representing plausible combinations that may be observed at the supplied Ang II concentration. The definition of PCD ( $\text{PASP} > 40\text{mmHg}$  or  $\text{RV/LV area ratio} > 0.6$ ) defines a region, and the proportion of the posterior distribution overlapping this region estimates the probability of PCD for the supplied Ang II concentration. The complex correlation structure of the design (correlations between the two endpoints and the repeated measures of each endpoint) was modeled using separate and smaller

variance covariance structures (2x2 unstructured for the endpoints and an 3x3 AR(1) for the repeated measures). These were combined using a Kronecker product. This improved the convergence properties of the model (fewer parameters to estimate) and allowed the “nuisance” parameter of time to be eliminated from the subsequent predictions. The joint posterior distribution is influenced by the individual relationships between Log(Ang II) versus PASP and Log(Ang II) versus RV size ratio because they determine the x- and y-axis co-ordinates of the joint posterior distribution central point in the region (each endpoint controls a particular axis). For example, in the hypothetical situation where there is a strong positive linear relationship between Log(Ang II) and PASP (steep slope) but no relationship between Log(Ang II) and RV size ratio (flat slope), the predictions for low and high Ang II concentrations would be different for PASP, but similar for RV size ratio. This would lead to a posterior distribution that appears to shift only along the direction of the x-axis, potentially changing the proportion of the distribution overlapping with the PCD region for large shifts. The size of the observed shift depends on the magnitude of the slope parameter and the pair of Ang II concentrations selected for the prediction. Strong associations between Ang II, PASP and RV size ratio are expected to manifest in non-zero slopes for both underlying linear relationships and non-overlapping joint posterior distributions when using a reasonably spaced pair of Ang II concentrations.

## Safety

The safety population of 57 participants was used for all safety analyses. No serious adverse events were reported. Laboratory values and vital sign abnormalities were consistent with a critically ill population.

## Supplemental Table S1. Disease diagnoses

| Disease    | Diagnostic criteria                                                                                                                                                                                                       |
|------------|---------------------------------------------------------------------------------------------------------------------------------------------------------------------------------------------------------------------------|
| ACP        | Dilated RV in the mid-esophagus longitudinal view or apical four-chamber view (end-diastolic RV/LV area ratio [0.6]) associated with the presence of septal dyskinesia in the (transgastric) short-axis view of the heart |
| Severe ACP | Severely dilated RV (end-diastolic RV/LV area ratio $\geq 1$ ) with septal dyskinesia. Septal dyskinesia will be particularly sought at end-systole, while analyzing loops in slow motion                                 |

|                   |                                                                                                                                                                                                                                                                                                                                                                                                                                                                                                                                                                                                                                                                                                                                                                                                                                                                                                                                                                                 |
|-------------------|---------------------------------------------------------------------------------------------------------------------------------------------------------------------------------------------------------------------------------------------------------------------------------------------------------------------------------------------------------------------------------------------------------------------------------------------------------------------------------------------------------------------------------------------------------------------------------------------------------------------------------------------------------------------------------------------------------------------------------------------------------------------------------------------------------------------------------------------------------------------------------------------------------------------------------------------------------------------------------|
| ARDS <sup>a</sup> | <p>Timing: Within 1 week of a known clinical insult or new or worsening respiratory symptoms</p> <p>Chest imaging: Bilateral opacities not fully explained by effusions, lobar/lung collapse or nodules</p> <p>Origin of oedema: Respiratory failure not fully explained by cardiac failure or fluid overload. Need objective assessment (e.g., echocardiography) to exclude hydrostatic oedema if no risk factor present</p> <p>Oxygenation:</p> <ul style="list-style-type: none"> <li>• Mild: <math>200 \text{ mm Hg} &lt; \text{PaO}_2/\text{FiO}_2 \leq 300 \text{ mm Hg}</math> with <math>\text{PEEP} \geq 5 \text{ cm H}_2\text{O}</math></li> <li>• Moderate: <math>100 \text{ mm Hg} &lt; \text{PaO}_2/\text{FiO}_2 \leq 200 \text{ mm Hg}</math> with <math>\text{PEEP} \geq 5 \text{ cm H}_2\text{O}</math></li> <li>• Severe: <math>\text{PaO}_2/\text{FiO}_2 \leq 100 \text{ mm Hg}</math> with <math>\text{PEEP} \geq 5 \text{ cm H}_2\text{O}</math></li> </ul> |
|-------------------|---------------------------------------------------------------------------------------------------------------------------------------------------------------------------------------------------------------------------------------------------------------------------------------------------------------------------------------------------------------------------------------------------------------------------------------------------------------------------------------------------------------------------------------------------------------------------------------------------------------------------------------------------------------------------------------------------------------------------------------------------------------------------------------------------------------------------------------------------------------------------------------------------------------------------------------------------------------------------------|

<sup>a</sup>Berlin definition.

*ACP* acute cor pulmonale; *ARDS* acute respiratory distress syndrome; *cm H<sub>2</sub>O* centimeters of water; *FiO<sub>2</sub>* fraction of inspired oxygen; *LV* left ventricle; *PaO<sub>2</sub>* partial pressure of oxygen; *PEEP* positive end-expiratory pressure; *RV* right ventricular.

## Supplemental Table S2. Patient respiratory profile at different time points

| Variable                               |                  | N  | Visit | n  | Mean    | SD       | Median  | Min.   | Max.   |
|----------------------------------------|------------------|----|-------|----|---------|----------|---------|--------|--------|
| PEEP (cm H <sub>2</sub> O)             | Any PCD/ACP      | 29 | DAY 1 | 29 | 6.966   | 4.2214   | 5.000   | 0.00   | 20.00  |
|                                        |                  |    | DAY 2 | 24 | 6.708   | 3.5322   | 5.000   | 0.00   | 15.00  |
|                                        |                  |    | DAY 3 | 21 | 6.810   | 2.7133   | 5.000   | 5.00   | 12.00  |
|                                        | No PCD/ACP       | 28 | DAY 1 | 27 | 5.852   | 4.4177   | 5.000   | 0.00   | 25.00  |
|                                        |                  |    | DAY 2 | 24 | 5.667   | 1.5228   | 5.000   | 5.00   | 10.00  |
|                                        |                  |    | DAY 3 | 18 | 5.722   | 2.1367   | 5.000   | 0.00   | 10.00  |
|                                        | All Participants | 57 | DAY 1 | 56 | 6.429   | 4.3143   | 5.000   | 0.00   | 25.00  |
|                                        |                  |    | DAY 2 | 48 | 6.188   | 2.7418   | 5.000   | 0.00   | 15.00  |
|                                        |                  |    | DAY 3 | 39 | 6.308   | 2.4937   | 5.000   | 0.00   | 12.00  |
| Plateau pressure (cm H <sub>2</sub> O) | Any PCD/ACP      | 29 | DAY 1 | 22 | 19.227  | 4.9755   | 18.000  | 12.00  | 31.00  |
|                                        |                  |    | DAY 2 | 12 | 19.583  | 4.8516   | 18.500  | 14.00  | 27.00  |
|                                        |                  |    | DAY 3 | 12 | 19.250  | 4.1588   | 18.000  | 15.00  | 26.00  |
|                                        | No PCD/ACP       | 28 | DAY 1 | 22 | 15.909  | 3.5309   | 15.500  | 12.00  | 27.00  |
|                                        |                  |    | DAY 2 | 15 | 16.867  | 4.9838   | 16.000  | 10.00  | 28.00  |
|                                        |                  |    | DAY 3 | 11 | 16.818  | 4.6652   | 18.000  | 10.00  | 25.00  |
|                                        | All Participants | 57 | DAY 1 | 44 | 17.568  | 4.5821   | 16.500  | 12.00  | 31.00  |
|                                        |                  |    | DAY 2 | 27 | 18.074  | 5.0225   | 18.000  | 10.00  | 28.00  |
|                                        |                  |    | DAY 3 | 23 | 18.087  | 4.4814   | 18.000  | 10.00  | 26.00  |
| Tidal Volume (mL)                      | Any PCD/ACP      | 29 | DAY 1 | 29 | 427.414 | 78.5882  | 440.000 | 280.00 | 650.00 |
|                                        |                  |    | DAY 2 | 23 | 413.696 | 84.4799  | 390.000 | 280.00 | 590.00 |
|                                        |                  |    | DAY 3 | 19 | 423.526 | 84.7259  | 400.000 | 280.00 | 560.00 |
|                                        | No PCD/ACP       | 28 | DAY 1 | 27 | 441.407 | 141.0263 | 455.000 | 5.00   | 640.00 |
|                                        |                  |    | DAY 2 | 24 | 509.917 | 92.3801  | 500.000 | 380.00 | 750.00 |

|                                |                  |    |       |    |         |          |         |        |         |
|--------------------------------|------------------|----|-------|----|---------|----------|---------|--------|---------|
|                                |                  |    | DAY 3 | 18 | 527.722 | 148.7109 | 500.000 | 363.00 | 1000.00 |
|                                | All Participants | 57 | DAY 1 | 56 | 434.161 | 112.2309 | 450.000 | 5.00   | 650.00  |
|                                |                  |    | DAY 2 | 47 | 462.830 | 100.2207 | 460.000 | 280.00 | 750.00  |
|                                |                  |    | DAY 3 | 37 | 474.216 | 129.6918 | 460.000 | 280.00 | 1000.00 |
| PaO2/FiO2 ratio                | Any PCD/ACP      | 29 | DAY 1 | 29 | 193.407 | 92.1688  | 195.000 | 45.00  | 440.00  |
|                                |                  |    | DAY 2 | 29 | 191.390 | 76.0851  | 188.000 | 59.00  | 344.30  |
|                                |                  |    | DAY 3 | 25 | 232.280 | 103.4942 | 208.000 | 93.00  | 468.00  |
|                                | No PCD/ACP       | 28 | DAY 1 | 28 | 223.286 | 112.8486 | 213.000 | 30.00  | 460.00  |
|                                |                  |    | DAY 2 | 25 | 237.412 | 118.6584 | 243.000 | 20.00  | 440.00  |
|                                |                  |    | DAY 3 | 22 | 241.673 | 133.7419 | 220.000 | 30.00  | 556.00  |
|                                | All Participants | 57 | DAY 1 | 57 | 208.084 | 103.0274 | 200.000 | 30.00  | 460.00  |
|                                |                  |    | DAY 2 | 54 | 212.696 | 99.8530  | 220.000 | 20.00  | 440.00  |
|                                |                  |    | DAY 3 | 47 | 236.677 | 117.3736 | 210.000 | 30.00  | 556.00  |
| Respiration rate (breaths/min) | Any PCD/ACP      | 29 | DAY 1 | 29 | 23.724  | 6.9277   | 25.000  | 12.00  | 35.00   |
|                                |                  |    | DAY 2 | 27 | 24.889  | 6.1603   | 25.000  | 15.00  | 35.00   |
|                                |                  |    | DAY 3 | 26 | 24.769  | 7.4098   | 25.000  | 12.00  | 38.00   |
|                                | No PCD/ACP       | 28 | DAY 1 | 24 | 17.042  | 5.3200   | 15.000  | 8.00   | 30.00   |
|                                |                  |    | DAY 2 | 21 | 18.048  | 4.6312   | 17.000  | 12.00  | 30.00   |
|                                |                  |    | DAY 3 | 21 | 17.048  | 4.9343   | 16.000  | 10.00  | 26.00   |
|                                | All Participants | 57 | DAY 1 | 53 | 20.698  | 7.0454   | 20.000  | 8.00   | 35.00   |
|                                |                  |    | DAY 2 | 48 | 21.896  | 6.4717   | 21.000  | 12.00  | 35.00   |
|                                |                  |    | DAY 3 | 47 | 21.319  | 7.4487   | 20.000  | 10.00  | 38.00   |

|                              |                  |    |       |    |        |         |        |      |       |
|------------------------------|------------------|----|-------|----|--------|---------|--------|------|-------|
| Mean Airway Pressure (cmH2O) | Any PCD/ACP      | 29 | DAY 1 | 20 | 12.395 | 5.3221  | 10.500 | 4.70 | 26.00 |
|                              |                  |    | DAY 2 | 19 | 11.611 | 4.4451  | 9.000  | 8.00 | 22.00 |
|                              |                  |    | DAY 3 | 14 | 16.464 | 18.6491 | 9.500  | 8.00 | 80.00 |
|                              | No PCD/ACP       | 28 | DAY 1 | 16 | 9.350  | 3.0018  | 8.800  | 6.00 | 18.00 |
|                              |                  |    | DAY 2 | 15 | 14.020 | 17.1233 | 9.000  | 5.00 | 75.00 |
|                              |                  |    | DAY 3 | 7  | 17.457 | 22.0278 | 8.400  | 6.00 | 67.00 |
|                              | All Participants | 57 | DAY 1 | 36 | 11.042 | 4.6468  | 9.300  | 4.70 | 26.00 |
|                              |                  |    | DAY 2 | 34 | 12.674 | 11.6894 | 9.000  | 5.00 | 75.00 |
|                              |                  |    | DAY 3 | 21 | 16.795 | 19.2836 | 9.000  | 6.00 | 80.00 |



Supplemental Table S3. Catecholamines at different time points

|       | Catecholamines | Any PCD/ACP |         | No PCD/ACP |         | All    |         |
|-------|----------------|-------------|---------|------------|---------|--------|---------|
| Visit |                | (N=29)      |         | (N=28)     |         | (N=57) |         |
| Day 1 | n              | 21          |         | 19         |         | 40     |         |
|       | NOREPINEPHRINE | 21          | (72.4%) | 19         | (67.9%) | 40     | (70.2%) |
|       | DOBUTAMINE     | 0           |         | 1          | (3.6%)  | 1      | (1.8%)  |
| Day 2 | n              | 15          |         | 16         |         | 31     |         |
|       | NOREPINEPHRINE | 15          | (51.7%) | 15         | (53.6%) | 30     | (52.6%) |
|       | DOBUTAMINE     | 0           |         | 1          | (3.6%)  | 1      | (1.8%)  |
| Day 3 | n              | 10          |         | 7          |         | 17     |         |
|       | NOREPINEPHRINE | 10          | (34.5%) | 7          | (25.0%) | 17     | (29.8%) |
|       | DOBUTAMINE     | 0           |         | 0          |         | 0      |         |

Supplemental Figure S1. Individual time profile of Ang II/Ang(1-7) ratio by time point

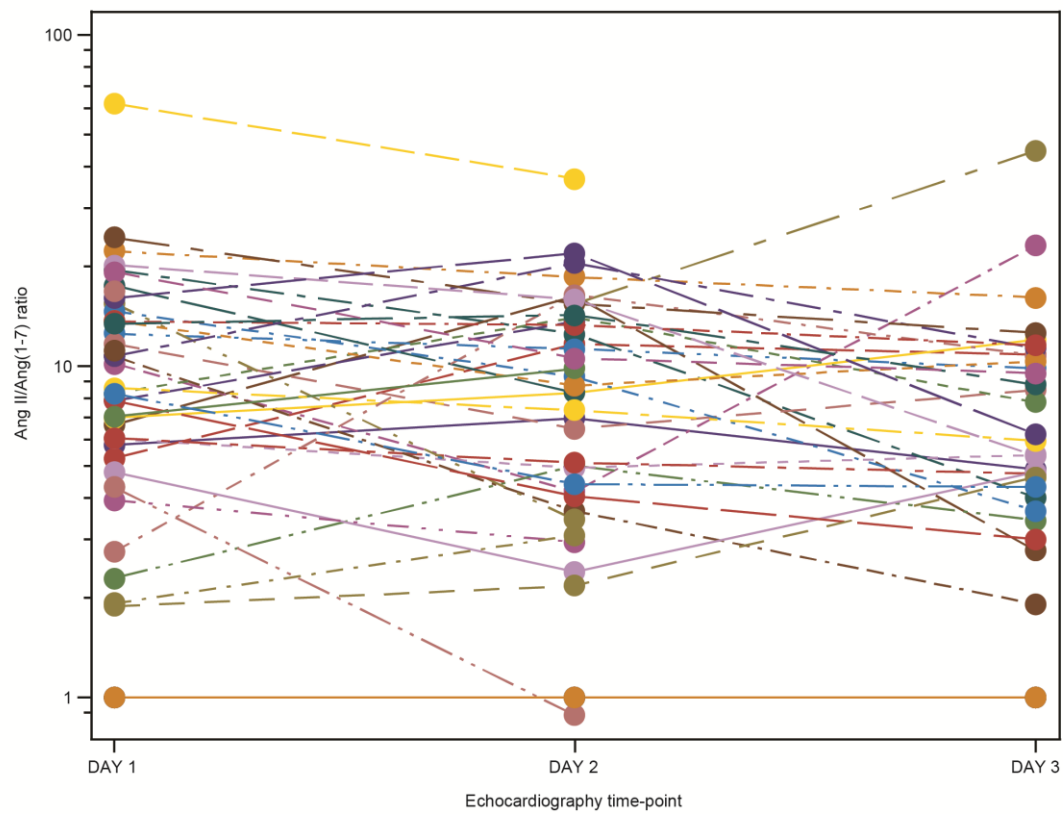

Ang angiotensin.
